# Supplementary material
Source: MDPI journal article supplement (https://www.mdpi.com/2313-576X/2/3/16)
Supplement: s1 [file s1]

## Supplementary Material:

### I—Helmets

- Hagel, B.; Macpherson, A.; Rivara, F.P.; Pless, B. Arguments against helmet legislation are flawed. *Br. Med. J.* **2006**, *332*, 725.
- Daneshvar, D.H.; Baugh, C.M.; Nowinski, C.J.; McKee, A.C.; Stern, R.A.; Cantu, R.C. Helmets and mouth guards: The role of personal equipment in preventing sport-related concussions. *Clin. Sports Med.* **2011**, *30*, 145–163.
- Ouellet, J.V. Helmet use and risk compensation in motorcycle accidents. *Traffic Inj. Prev.* **2011**, *12*, 71–81.
- Phillips, R.O.; Fyhri, A.; Sagberg, F. Risk compensation and bicycle helmets. *Risk Anal.* **2011**, *31*, 1187–1195.
- McNally, D.S.; Whitehead, S. A computational simulation study of the influence of helmet wearing on head injury risk in adult cyclists. *Accid. Anal. Prev.* **2013**, *60*, 15–23.
- Thomson, C.J.; Carlson, S.R. Increased patterns of risky behaviours among helmet wearers in skiing and snowboarding. *Accid. Anal. Prev.* **2015**, *75*, 179–183.

### II—Motorcycle helmets

- Watson, G.S.; Zador, P.L.; Wilks, A. Helmet use, helmet use laws, and motorcyclist fatalities. *Am. J. Public Health* **1981**, *71*, 297–300.
- Muelleman, R.L.; Mlinek, E.J.; Collicott, P.E. Motorcycle crash injuries and costs: Effect of a reenacted comprehensive helmet use law. *Ann. Emerg. Med.* **1992**, *21*, 266–272.
- Kraus, J.F.; Peek, C.; McArthur, D.L.; Williams, A. The effect of the 1992 California motorcycle helmet use law on motorcycle crash fatalities and injuries. *JAMA* **1994**, *272*, 1506–1511.

### III—Motor vehicle

- Von Buseck, C.R.; Evans, L.; Schmidt, D.E.; Wasielewski, P. Seat belt usage and risk taking in driving behavior. In *Accident Causation*; Society of Automotive Engineers: Warrendale, PA, USA, 1980.
- Lund, A.K.; Zador, P. Mandatory belt use and driver risk taking. *Risk Anal.* **1984**, *4*, 41–53.
- O'Neill, B.; Lund, A.K.; Zador, P.; Ashton, S. Mandatory belt use and driver risk taking: An empirical evaluation off the risk compensation hypothesis. In *International Symposium on Human Behavior and Traffic Safety*; General Motors Research Laboratories: Warren, MI, USA, 1984.
- Graham, J.D. Technology, behavior and safety: An empirical study of automobile occupant protection regulation. *Policy Sci.* **1984**, *17*, 141–151.
- Graham, J.D.; Garber, S. Evaluating the effects of automobile safety regulation. *J. Policy Anal. Manag.* **1984**, *3*, 206–224.
- O'Neill, B.; Lund, A.K. The effectiveness of air bags in preventing driver fatalities in the United States. In *Proceedings of the International Conference on Air Bags and Seat Belts: Evaluation and Implications for Public Policy*, Montreal, PQ, Canada, 18–20 October 1992; Health and Welfare Canada: Montreal, PQ, Canada, 1992.
- Zador, P.L.; Ciccone, M.A. Automobile driver fatalities in frontal impacts: Air bags compared with manual belts. *Am. J. Public Health* **1993**, *83*, 661–666.
- Janssen, W. Seat -belt wearing and driving behavior: An instrumented-vehicle study. *Accid. Anal. Prev.* **1994**, *26*, 249–261.
- Ferguson, S.A.; Lund, A.K.; Greene, M.A. *Driver Fatalities in 1985–1994 Air Bag Cars*; Insurance Institute for Highway Safety: Arlington, VA, USA, 1995.
- Lund, A.K.; Ferguson, S.A. Driver fatalities in 1985–1993 cars with airbags. *J. Trauma Acute Care Surg.* **1995**, *38*, 469–475.
- Peterson, S.; Hoffer, G.; Millner, E. Are drivers of air-bag equipped cars more aggressive? A test of the offsetting behavior hypothesis. *J. Law Econ.* **1995**, *38*, 251–264.
- Fosser, S.; Sageber, F.; Sætermo, A.F. Behavioural adaptation to antilock brakes—Drivers keep a shorter distance. *Nord. Road Transp. Res.* **1996**, *8*, 21–22.
- Kent, R.; Viano, D.C.; Crandall, J. The field performance of frontal air bags: A review of the literature. *Traffic Inj. Prev.* **2005**, *6*, 1–23.
